# Supplementary material for: Real-space visualization of sequential debromination of polybrominated benzenes on Ag(111)
Source: Royal Society of Chemistry journal article supplement (doi:10.1039/d2cc05876f), 2022-12-13
Supplement: d2cc05876f1.pdf [file d2cc05876f1.pdf]

Supporting information for

**Real-space visualization of sequential debromination of  
polybrominated benzenes on Ag(111)**

Lina Shang, Wenzhe Gao, Faming Kang, Zhaoyu Zhang, Chi Zhang\* and Wei Xu\*

Interdisciplinary Materials Research Center, College of Materials Science and Engineering, Tongji University, Shanghai 201804, People's Republic of China.

## Experimental and Theoretical Methods

All STM experiments were carried out in an ultra-high vacuum (UHV) chamber with a base pressure of  $1 \times 10^{-10}$  mbar. The whole system was equipped with a variable-temperature, fast scanning “Aarhus-type” STM using electrochemically etched W tips purchased from SPECS<sup>1, 2</sup>, a molecular evaporator, and standard facilities for sample preparation. The Ag(111) surface was cleaned by several cycles of 1.5 eV Ar<sup>+</sup> sputtering and annealing at 780 K. After thoroughly degassing, the three polyhalogenated aromatics, namely, 1,2,3-TBB, 1,3,5-TBB, and 1,2,4,5-TBB molecules, were deposited onto the Ag(111) surface from a molecular evaporator separately. The sample was thereafter transferred within the UHV chamber to the STM head. All the STM measurements were performed in a typical temperature range of 100 – 150 K, and the typical scanning parameters were  $V_t = \pm 700 - 1000$  mV and  $I_t = 0.5 - 1.2$  nA. STM images were further smoothed to eliminate noise. All the calculations were performed based on periodic density functional theory (DFT) by using the Vienna ab initio simulation package (VASP) code<sup>3, 4</sup>. The projector-augmented wave method was used to describe the interaction between ions and electrons<sup>5, 6</sup>, and the Perdew-Burke-Ernzerhof (PBE) generalized gradient approximation of the exchange-correlation functional was employed<sup>7</sup>. Van der Waals (vdW) corrections to the PBE density functional were also included using the DFT-D3 method reported by Grimme<sup>8</sup>. The atomic structures were relaxed until the forces on all unconstrained atoms were  $\leq 0.03$  eV/Å. The simulated STM images were obtained by using the Tersoff–Hamann method<sup>9</sup>, in which the local density of states (LDOS) is used to approximate the tunneling current. DFT calculations on the monomer and two kinds of organometallic dimers from 1,2,3-TBB were performed including Ag(111) substrate. The Ag(111) substrate was modelled by a four-layered slab separated by a  $\sim 15$  Å vacuum region for the structural models, where the bottom two layers were fixed. As for the situations of 1,3,5-TBB and 1,2,4,5-TBB, the structural models were optimized in gas phase.

## Additional Data

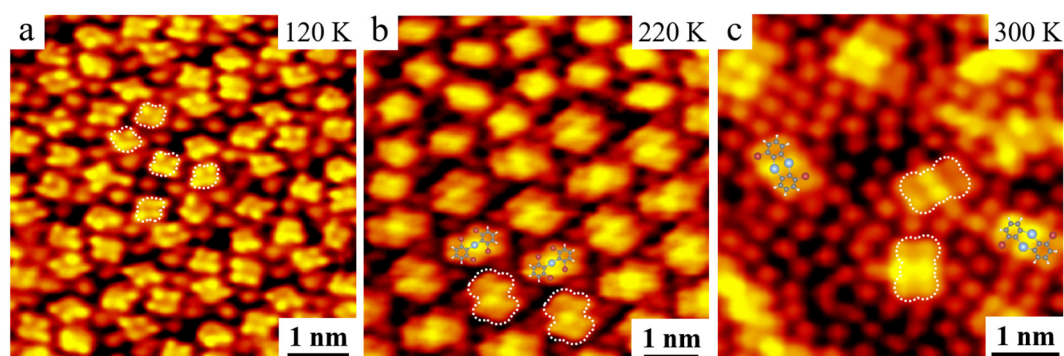

**Figure S1.** Large-scale STM images of (a) 1,2,3-TBB monomers, (b, c) organometallic dimers obtained upon deposition at (a)  $\sim 120$  K, (b)  $\sim 220$  K, and (c) 300 K. The white contours indicate individual motifs, respectively.

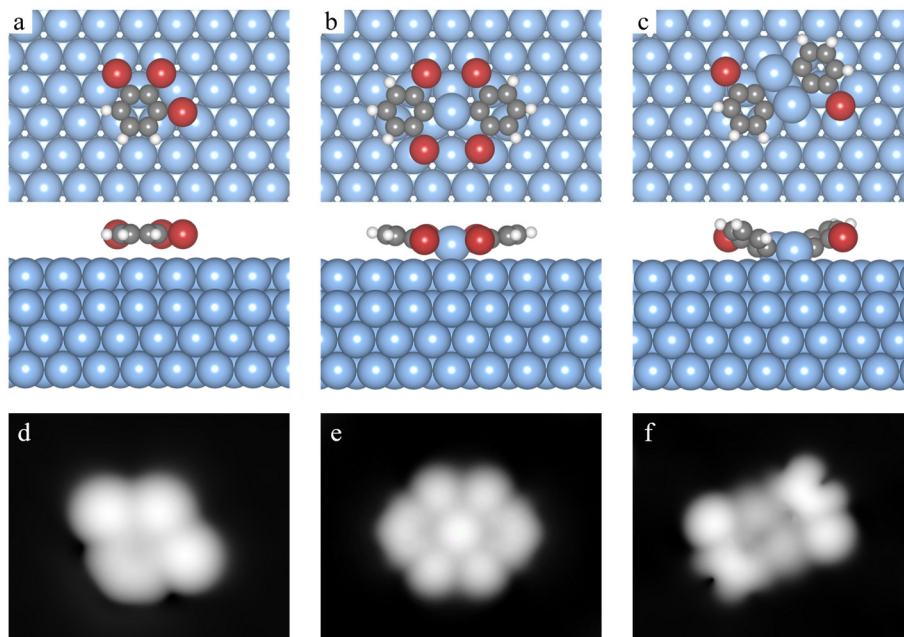

**Figure S2.** (a)-(c) DFT optimized structural models of the (a) monomer and (b), (c) two kinds of organometallic dimers from 1,2,3-TBB on Ag(111). (d)-(f) Corresponding STM simulations based on the structural models.

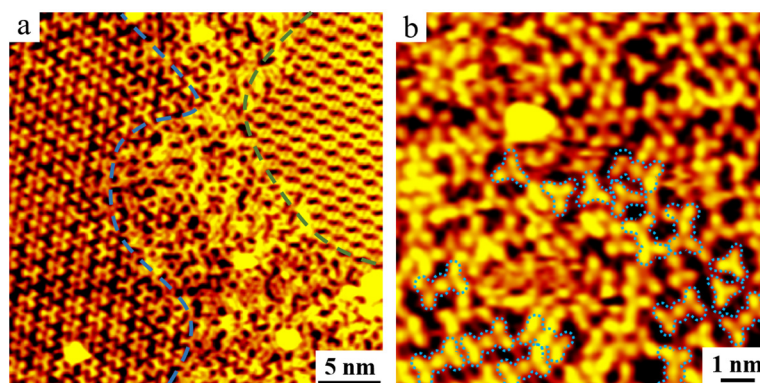

**Figure S3.** (a) Large-scale STM image showing the coexistence of monomers and dimers after deposition of 1,3,5-TBB onto Ag(111) at 300 K. (b) Typical zoomed-in high-resolution STM image showing the details of the disordered phase involved, which is dominantly made up of monomers and organometallic dimers coexisting with some impurities.

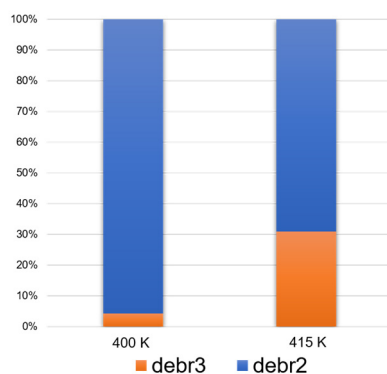

**Figure S4.** Statistics showing the proportion of doubly- (debr2) and triply-dehalogenated (debr3) 1,3,5-TBB involved in the structural phases obtained after annealing at ~400 K and ~415 K.

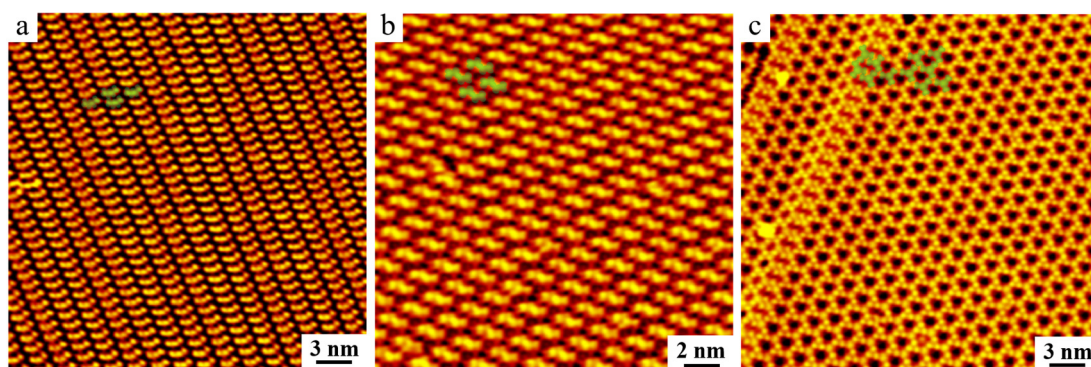

**Figure S5.** Large-scale STM image of organometallic (a) dimer 1 and (b) dimer 2 of 1,2,4,5-TBB obtained upon annealing at ~200 K. (c) Large-scale STM image of organometallic trimers of 1,2,4,5-TBB obtained upon annealing at ~250K. Individual motifs (i.e., organometallic dimers and trimers) involved in the debromination process are highlighted in green.

## References

1. E. Laegsgaard, L. Österlund, P. Thostrup, P. B. Rasmussen, I. Stensgaard and F. Besenbacher, *Rev. Sci. Instrum.*, 2001, **72**, 3537-3542.
2. F. Besenbacher, *Rep. Prog. Phys.*, 1996, **59**, 1737-1802.
3. G. Kresse and J. Hafner, *Phys. Rev. B*, 1993, **48**, 13115-13118.
4. G. Kresse and J. Furthmüller, *Phys. Rev. B*, 1996, **54**, 11169-11186.
5. P. E. Blöchl, *Phys. Rev. B*, 1994, **50**, 17953-17979.
6. G. Kresse and D. Joubert, *Phys. Rev. B*, 1999, **59**, 1758-1775.
7. J. P. Perdew, K. Burke and M. Ernzerhof, *Phys. Rev. Lett.*, 1996, **77**, 3865-3868.
8. S. Grimme, J. Antony, S. Ehrlich and H. Krieg, *J. Chem. Phys.*, 2010, **132**, 154104.
9. J. Tersoff and D. R. Hamann, *Phys. Rev. B*, 1985, **31**, 805-813.
